# Supplementary material
Source: ML conference proceedings conference paper supplement (https://proceedings.neurips.cc/paper_files/paper/2012/hash/15d4e891d784977cacbfcbb00c48f133-Abstract.html)
Supplement: Supplementary file 1 [file 15d4e891d784977cacbfcbb00c48f133-Supplemental.zip]

## A Illustrative empirical results

We applied a variant of Algorithm 2 to the UCI “Bag of Words” dataset comprised of New York Times articles. This data set has 300000 articles and a vocabulary of size  $d = 102660$ ; we set  $k = 50$  and  $\alpha_0 = 0$ . Following [37], instead of using a single random  $\theta$  and obtaining singular vectors of  $\hat{W}^\top \text{Triples}_{\alpha_0}(\hat{W}\theta)\hat{W}$ , we used the following power iteration to obtain the singular vectors  $\{\hat{v}_1, \hat{v}_2, \dots, \hat{v}_k\}$ :

$\{\hat{v}_1, \hat{v}_2, \dots, \hat{v}_k\} \leftarrow$  random orthonormal basis for  $\mathbb{R}^k$ .  
Repeat:  
1. For  $i = 1, 2, \dots, k$ :  

$$\hat{v}_i \leftarrow \hat{W}^\top \text{Triples}_{\alpha_0}(\hat{W}\hat{v}_i)\hat{W}\hat{v}_i.$$
  
2. Orthonormalize  $\{\hat{v}_1, \hat{v}_2, \dots, \hat{v}_k\}$ .

The top 25 words (ordered by estimated conditional probability value) from each topic are shown below.

|                                                                                                                                                                                                                                                                                                                                             |                                                                                                                                                                                                                                                                                                                                                                                             |                                                                                                                                                                                                                                                                              |                                                                                                                                                                                                                                                                 |                                                                                                                                                                                                                                                                                                  |                                                                                                                                                                                                                                                                                       |                                                                                                                                                                                                                                 |                                                                                                                                                                                                                                       |
|---------------------------------------------------------------------------------------------------------------------------------------------------------------------------------------------------------------------------------------------------------------------------------------------------------------------------------------------|---------------------------------------------------------------------------------------------------------------------------------------------------------------------------------------------------------------------------------------------------------------------------------------------------------------------------------------------------------------------------------------------|------------------------------------------------------------------------------------------------------------------------------------------------------------------------------------------------------------------------------------------------------------------------------|-----------------------------------------------------------------------------------------------------------------------------------------------------------------------------------------------------------------------------------------------------------------|--------------------------------------------------------------------------------------------------------------------------------------------------------------------------------------------------------------------------------------------------------------------------------------------------|---------------------------------------------------------------------------------------------------------------------------------------------------------------------------------------------------------------------------------------------------------------------------------------|---------------------------------------------------------------------------------------------------------------------------------------------------------------------------------------------------------------------------------|---------------------------------------------------------------------------------------------------------------------------------------------------------------------------------------------------------------------------------------|
| zzz_held<br>send<br>advisory<br>publication<br>released<br>guard<br>zzz_attn_editor<br>undatedlined<br>night<br>advance<br>zzz_andrew_pollack<br>zzz_douglas_frantz<br>billion<br>zzz_jennifer<br>zzz_dirk_johnson<br>zzz_leslie<br>cell<br>zzz_linda<br>games<br>zzz_lee<br>zzz_james_brooke<br>zzz_winnipeg<br>deal<br>husband<br>zzz usc | premature<br>guard<br>zzz_held<br>released<br>publication<br>advisory<br>send<br>undatedlined<br>zzz_washington_datelined<br>zzz_istanbul<br>zzz_attn_editor<br>zzz_seth_mydan<br>nyt<br>zzz_johannesburg<br>zzz_afghanistan<br>zzz_jane_perlez<br>zzz_john_broder<br>zzz_warren<br>zzz_melbourne<br>zzz_lexington<br>zzz_erik_eckholm<br>zzz_bernard_simon<br>substitute<br>close<br>point | las<br>como<br>los<br>zzz_latin_trade<br>articulo<br>telefono<br>transmiten<br>fax<br>una<br>del<br>articulos<br>espanol<br>paises<br>sobre<br>financial<br>zzz_america_latina<br>notas<br>prohibitivo<br>con<br>revista<br>tiene<br>economia<br>costo<br>otros<br>zzz_paris | sales<br>economic<br>consumer<br>major<br>home<br>indicator<br>weekly<br>order<br>claim<br>scheduled<br>listed<br>dates<br>jobless<br>prices<br>price<br>market<br>leading<br>retailer<br>economy<br>index<br>retail<br>spending<br>product<br>cost<br>producer | million<br>shares<br>public<br>offering<br>source<br>initial<br>debt<br>bond<br>billion<br>share<br>quarter<br>revenue<br>market<br>zzz_calif<br>school<br>zzz_new_york<br>cash<br>stock<br>percent<br>securities<br>zzz_credit_suisse_first_boston<br>deal<br>contract<br>president<br>expected | com<br>question<br>information<br>zzz_eastern<br>sport<br>daily<br>commentary<br>business<br>newspaper<br>separate<br>spot<br>marked<br>today<br>zzz_tom_oder<br>holiday<br>need<br>staffed<br>development<br>toder<br>client<br>eta<br>directed<br>additional<br>reach<br>washington | run<br>inning<br>hit<br>game<br>season<br>home<br>right<br>games<br>zzz_dodger<br>left<br>team<br>start<br>yankees<br>pitcher<br>ball<br>pitch<br>manager<br>lead<br>night<br>homer<br>field<br>play<br>ranger<br>win<br>hitter | women<br>team<br>woman<br>job<br>sport<br>cancer<br>look<br>company<br>group<br>percent<br>girl<br>study<br>game<br>games<br>female<br>american<br>number<br>season<br>breast<br>play<br>zzz_taliban<br>right<br>part<br>male<br>high |
|---------------------------------------------------------------------------------------------------------------------------------------------------------------------------------------------------------------------------------------------------------------------------------------------------------------------------------------------|---------------------------------------------------------------------------------------------------------------------------------------------------------------------------------------------------------------------------------------------------------------------------------------------------------------------------------------------------------------------------------------------|------------------------------------------------------------------------------------------------------------------------------------------------------------------------------------------------------------------------------------------------------------------------------|-----------------------------------------------------------------------------------------------------------------------------------------------------------------------------------------------------------------------------------------------------------------|--------------------------------------------------------------------------------------------------------------------------------------------------------------------------------------------------------------------------------------------------------------------------------------------------|---------------------------------------------------------------------------------------------------------------------------------------------------------------------------------------------------------------------------------------------------------------------------------------|---------------------------------------------------------------------------------------------------------------------------------------------------------------------------------------------------------------------------------|---------------------------------------------------------------------------------------------------------------------------------------------------------------------------------------------------------------------------------------|

|                                                                                                                                                                                                                                                                                  |                                                                                                                                                                                                                              |                                                                                                                                                                                                                                                                                                                          |                                                                                                                                                                                                                                                                                                                            |                                                                                                                                                                                                                                                                                                          |                                                                                                                                                                                                                                 |                                                                                                                                                                                                                                            |                                                                                                                                                                                                                                                       |                                                                                                                                                                                                                                                                  |
|----------------------------------------------------------------------------------------------------------------------------------------------------------------------------------------------------------------------------------------------------------------------------------|------------------------------------------------------------------------------------------------------------------------------------------------------------------------------------------------------------------------------|--------------------------------------------------------------------------------------------------------------------------------------------------------------------------------------------------------------------------------------------------------------------------------------------------------------------------|----------------------------------------------------------------------------------------------------------------------------------------------------------------------------------------------------------------------------------------------------------------------------------------------------------------------------|----------------------------------------------------------------------------------------------------------------------------------------------------------------------------------------------------------------------------------------------------------------------------------------------------------|---------------------------------------------------------------------------------------------------------------------------------------------------------------------------------------------------------------------------------|--------------------------------------------------------------------------------------------------------------------------------------------------------------------------------------------------------------------------------------------|-------------------------------------------------------------------------------------------------------------------------------------------------------------------------------------------------------------------------------------------------------|------------------------------------------------------------------------------------------------------------------------------------------------------------------------------------------------------------------------------------------------------------------|
| drug<br>patient<br>million<br>company<br>doctor<br>companies<br>percent<br>cost<br>program<br>health<br>care<br>billion<br>plan<br>medical<br>treatment<br>zzz.aid<br>disease<br>cancer<br>hospital<br>prescription<br>federal<br>government<br>product<br>zzz.medicare<br>study | player<br>zzz.tiger_wood<br>won<br>shot<br>play<br>round<br>win<br>tournament<br>tour<br>right<br>par<br>final<br>playing<br>major<br>ball<br>hit<br>lead<br>golf<br>guy<br>hole<br>course<br>game<br>played<br>night<br>set | article<br>zzz_new-york<br>misstated<br>zzz_boston_globe<br>zzz_united_states<br>company<br>president<br>campaign<br>zzz_clinton<br>surname<br>player<br>incorrectly<br>point<br>film<br>director<br>office<br>school<br>home<br>misspelled<br>died<br>information<br>misidentified<br>referred<br>zzz_washington<br>son | palestinian<br>zzz_israel<br>zzz_israeli<br>zzz_yasser_arafat<br>peace<br>israeli<br>israelis<br>leader<br>official<br>attack<br>zzz_bush<br>zzz_west_bank<br>zzz_palestinian<br>violence<br>security<br>killed<br>talk<br>military<br>jewish<br>zzz_jerusalem<br>soldier<br>zzz_clinton<br>zzz_sharon<br>minister<br>fire | tax<br>cut<br>percent<br>zzz_bush<br>billion<br>plan<br>bill<br>taxes<br>million<br>zzz_congress<br>zzz_george_bush<br>economy<br>money<br>income<br>government<br>spending<br>federal<br>pay<br>republican<br>zzz_white_house<br>zzz_senate<br>zzz_democrat<br>sales<br>zzz_social_security<br>proposal | cup<br>minutes<br>oil<br>water<br>add<br>tablespoon<br>food<br>teaspoon<br>pepper<br>sugar<br>large<br>fat<br>butter<br>sauce<br>serving<br>hour<br>fresh<br>pan<br>taste<br>bowl<br>cream<br>onion<br>serve<br>medium<br>pound | point<br>game<br>team<br>shot<br>play<br>zzz_laker<br>season<br>half<br>lead<br>games<br>quarter<br>minutes<br>night<br>left<br>goal<br>king<br>final<br>played<br>scored<br>zzz_kobe_bryant<br>rebound<br>right<br>win<br>percent<br>ball | yard<br>game<br>play<br>season<br>team<br>touchdown<br>quarterback<br>coach<br>defense<br>quarter<br>ball<br>field<br>pass<br>run<br>offense<br>line<br>running<br>defensive<br>zzz_nfl<br>football<br>receiver<br>left<br>win<br>player<br>zzz_giant | percent<br>stock<br>market<br>fund<br>investor<br>companies<br>analyst<br>money<br>investment<br>economy<br>point<br>company<br>quarter<br>price<br>billion<br>earning<br>prices<br>firm<br>index<br>growth<br>zzz_nasdaq<br>shares<br>rates<br>rate<br>interest |
|----------------------------------------------------------------------------------------------------------------------------------------------------------------------------------------------------------------------------------------------------------------------------------|------------------------------------------------------------------------------------------------------------------------------------------------------------------------------------------------------------------------------|--------------------------------------------------------------------------------------------------------------------------------------------------------------------------------------------------------------------------------------------------------------------------------------------------------------------------|----------------------------------------------------------------------------------------------------------------------------------------------------------------------------------------------------------------------------------------------------------------------------------------------------------------------------|----------------------------------------------------------------------------------------------------------------------------------------------------------------------------------------------------------------------------------------------------------------------------------------------------------|---------------------------------------------------------------------------------------------------------------------------------------------------------------------------------------------------------------------------------|--------------------------------------------------------------------------------------------------------------------------------------------------------------------------------------------------------------------------------------------|-------------------------------------------------------------------------------------------------------------------------------------------------------------------------------------------------------------------------------------------------------|------------------------------------------------------------------------------------------------------------------------------------------------------------------------------------------------------------------------------------------------------------------|

|                                                                                                                                                                                                                                                                                                                    |                                                                                                                                                                                                                                                                                                                                 |                                                                                                                                                                                                                              |                                                                                                                                                                                                                                                   |                                                                                                                                                                                                                                                                                                              |                                                                                                                                                                                                                                                           |                                                                                                                                                                                                                                                                                                                                |                                                                                                                                                                                                                                                                                   |                                                                                                                                                                                                                                                                |
|--------------------------------------------------------------------------------------------------------------------------------------------------------------------------------------------------------------------------------------------------------------------------------------------------------------------|---------------------------------------------------------------------------------------------------------------------------------------------------------------------------------------------------------------------------------------------------------------------------------------------------------------------------------|------------------------------------------------------------------------------------------------------------------------------------------------------------------------------------------------------------------------------|---------------------------------------------------------------------------------------------------------------------------------------------------------------------------------------------------------------------------------------------------|--------------------------------------------------------------------------------------------------------------------------------------------------------------------------------------------------------------------------------------------------------------------------------------------------------------|-----------------------------------------------------------------------------------------------------------------------------------------------------------------------------------------------------------------------------------------------------------|--------------------------------------------------------------------------------------------------------------------------------------------------------------------------------------------------------------------------------------------------------------------------------------------------------------------------------|-----------------------------------------------------------------------------------------------------------------------------------------------------------------------------------------------------------------------------------------------------------------------------------|----------------------------------------------------------------------------------------------------------------------------------------------------------------------------------------------------------------------------------------------------------------|
| zzz_al_gore<br>campaign<br>president<br>zzz_george_bush<br>zzz_bush<br>zzz_clinton<br>vice<br>presidential<br>million<br>democratic<br>night<br>voter<br>election<br>vote<br>plan<br>zzz_bill_bradley<br>ballot<br>zzz_governor_bush<br>republican<br>zzz_florida<br>right<br>votes<br>poll<br>court<br>candidates | zzz_george_bush<br>president<br>campaign<br>republican<br>zzz_john_mccain<br>election<br>zzz_texas<br>presidential<br>political<br>zzz_enron<br>governor<br>administration<br>democratic<br>zzz_white_house<br>voter<br>nation<br>public<br>zzz_clinton<br>republican<br>candidate<br>point<br>question<br>percent<br>zzz_party | car<br>race<br>driver<br>team<br>won<br>win<br>racing<br>track<br>season<br>lap<br>point<br>sport<br>seat<br>races<br>road<br>run<br>look<br>right<br>zzz_nascar<br>drive<br>zzz_winston_cup<br>owner<br>start<br>big<br>ago | book<br>children<br>ages<br>author<br>read<br>newspaper<br>web<br>writer<br>written<br>sales<br>find<br>history<br>list<br>word<br>published<br>school<br>zzz_new_york<br>right<br>boy<br>writing<br>american<br>reading<br>game<br>reader<br>won | zzz_taliban<br>attack<br>zzz_afghanistan<br>official<br>military<br>zzz_u_s<br>zzz_united_states<br>terrorist<br>war<br>bin<br>laden<br>zzz_american<br>zzz_bush<br>government<br>group<br>forces<br>zzz_pakistan<br>country<br>leader<br>american<br>afghan<br>troop<br>terrorism<br>nation<br>zzz_pentagon | com<br>www<br>site<br>web<br>sites<br>information<br>online<br>mail<br>internet<br>telegram<br>visit<br>find<br>zzz_internet<br>computer<br>org<br>newspaper<br>offer<br>free<br>services<br>company<br>official<br>list<br>user<br>companies<br>customer | zzz_bush<br>percent<br>campaign<br>zzz_enron<br>administration<br>president<br>zzz_white_house<br>money<br>plan<br>republican<br>company<br>million<br>zzz_republican<br>official<br>zzz_texas<br>election<br>show<br>political<br>zzz_mccain<br>energy<br>zzz_washington<br>zzz_united_states<br>voter<br>fund<br>zzz_al_gore | court<br>case<br>law<br>lawyer<br>federal<br>government<br>decision<br>trial<br>zzz_microsoft<br>right<br>judge<br>legal<br>ruling<br>attorney<br>death<br>system<br>company<br>zzz_supreme_court<br>election<br>cases<br>prosecutor<br>public<br>zzz_florida<br>ballot<br>states | percent<br>number<br>group<br>rate<br>million<br>sales<br>survey<br>according<br>study<br>quarter<br>average<br>economy<br>american<br>increase<br>rose<br>black<br>student<br>level<br>school<br>season<br>poll<br>newspaper<br>job<br>consumer<br>government |
|--------------------------------------------------------------------------------------------------------------------------------------------------------------------------------------------------------------------------------------------------------------------------------------------------------------------|---------------------------------------------------------------------------------------------------------------------------------------------------------------------------------------------------------------------------------------------------------------------------------------------------------------------------------|------------------------------------------------------------------------------------------------------------------------------------------------------------------------------------------------------------------------------|---------------------------------------------------------------------------------------------------------------------------------------------------------------------------------------------------------------------------------------------------|--------------------------------------------------------------------------------------------------------------------------------------------------------------------------------------------------------------------------------------------------------------------------------------------------------------|-----------------------------------------------------------------------------------------------------------------------------------------------------------------------------------------------------------------------------------------------------------|--------------------------------------------------------------------------------------------------------------------------------------------------------------------------------------------------------------------------------------------------------------------------------------------------------------------------------|-----------------------------------------------------------------------------------------------------------------------------------------------------------------------------------------------------------------------------------------------------------------------------------|----------------------------------------------------------------------------------------------------------------------------------------------------------------------------------------------------------------------------------------------------------------|

|            |              |              |               |               |            |                 |             |                |
|------------|--------------|--------------|---------------|---------------|------------|-----------------|-------------|----------------|
| company    | show         | game         | computer      | film          | team       | bill            | cell        | election       |
| percent    | network      | games        | system        | movie         | player     | zzz_senate      | patent      | ballot         |
| million    | season       | season       | program       | director      | season     | law             | human       | vote           |
| business   | zzz_nbc      | play         | zzz_microsoft | play          | game       | right           | research    | voter          |
| companies  | zzz_cb       | goal         | mail          | character     | coach      | zzz.white.house | group       | campaign       |
| billion    | program      | king         | software      | actor         | play       | zzz.congress    | scientist   | political      |
| analyst    | television   | team         | window        | show          | games      | vote            | zzz_enron   | votes          |
| stock      | series       | won          | web           | movies        | right      | member          | study       | official       |
| quarter    | night        | player       | company       | million       | league     | president       | disease     | zzz.florida    |
| executive  | zzz_new.york | coach        | million       | part          | million    | legislation     | information | democratic     |
| deal       | zzz_abc      | played       | information   | zzz.hollywood | deal       | zzz.clinton     | found       | race           |
| sales      | tonight      | period       | need          | look          | manager    | group           | team        | zzz_republican |
| share      | hour         | left         | technology    | big           | need       | zzz.house       | public      | recount        |
| zzz_enron  | look         | playing      | user          | young         | contract   | republican      | doctor      | republican     |
| chief      | zzz.fox      | night        | security      | music         | guy        | campaign        | government  | won            |
| market     | air          | win          | zzz.internet  | set           | point      | federal         | death       | leader         |
| employees  | viewer       | right        | problem       | screen        | played     | money           | cancer      | candidate      |
| customer   | rating       | com          | internet      | writer        | baseball   | election        | researcher  | zzz.al.gore    |
| president  | game         | playoff      | money         | television    | agent      | support         | stem        | zzz-party      |
| product    | early        | power        | home          | making        | fan        | zzz_republican  | official    | poll           |
| executives | big          | guy          | network       | love          | playing    | measure         | problem     | candidates     |
| financial  | talk         | zzz_new.york | product       | played        | job        | issue           | called      | party          |
| earning    | event        | record       | called        | producer      | free       | passed          | medical     | presidential   |
| operation  | hit          | shot         | help          | guy           | sport      | percent         | director    | win            |
| cent       | award        | minutes      | number        | kind          | basketball | billion         | question    | result         |

|                                                                                                                                                                                                                                                               |                                                                                                                                                                                                                                                                    |                                                                                                                                                                                                                                                                           |                                                                                                                                                                                                                              |                                                                                                                                                                                                                              |                                                                                                                                                                                                                                               |                                                                                                                                                                                                                                                                                                                |                                                                                                                                                                                                                                                                            |                                                                                                                                                                                                                                                                                       |
|---------------------------------------------------------------------------------------------------------------------------------------------------------------------------------------------------------------------------------------------------------------|--------------------------------------------------------------------------------------------------------------------------------------------------------------------------------------------------------------------------------------------------------------------|---------------------------------------------------------------------------------------------------------------------------------------------------------------------------------------------------------------------------------------------------------------------------|------------------------------------------------------------------------------------------------------------------------------------------------------------------------------------------------------------------------------|------------------------------------------------------------------------------------------------------------------------------------------------------------------------------------------------------------------------------|-----------------------------------------------------------------------------------------------------------------------------------------------------------------------------------------------------------------------------------------------|----------------------------------------------------------------------------------------------------------------------------------------------------------------------------------------------------------------------------------------------------------------------------------------------------------------|----------------------------------------------------------------------------------------------------------------------------------------------------------------------------------------------------------------------------------------------------------------------------|---------------------------------------------------------------------------------------------------------------------------------------------------------------------------------------------------------------------------------------------------------------------------------------|
| money<br>million<br>fund<br>zzz_enron<br>campaign<br>program<br>group<br>plan<br>government<br>firm<br>company<br>pay<br>worker<br>help<br>job<br>political<br>lawyer<br>member<br>account<br>effort<br>billion<br>employees<br>financial<br>question<br>need | police<br>officer<br>official<br>president<br>government<br>attack<br>case<br>told<br>office<br>member<br>public<br>death<br>group<br>zzz_new_york<br>chief<br>black<br>lawyer<br>prosecutor<br>security<br>building<br>campaign<br>night<br>hour<br>home<br>found | team<br>game<br>win<br>won<br>zzz_u_s<br>play<br>games<br>official<br>point<br>run<br>home<br>zzz_united_states<br>sport<br>zzz_new_york<br>attack<br>tournament<br>american<br>percent<br>minutes<br>zzz_olympic<br>final<br>player<br>company<br>lead<br>zzz_washington | air<br>water<br>million<br>high<br>building<br>power<br>plant<br>plan<br>cost<br>hour<br>system<br>wind<br>part<br>weather<br>area<br>home<br>rain<br>shower<br>front<br>program<br>billion<br>night<br>feet<br>low<br>miles | family<br>children<br>home<br>father<br>mother<br>son<br>parent<br>child<br>friend<br>school<br>boy<br>wife<br>house<br>told<br>daughter<br>kid<br>night<br>help<br>care<br>left<br>official<br>room<br>money<br>hour<br>job | music<br>song<br>group<br>part<br>zzz_new_york<br>company<br>million<br>band<br>show<br>album<br>companies<br>record<br>play<br>right<br>business<br>look<br>artist<br>home<br>industry<br>member<br>black<br>sound<br>night<br>called<br>fan | official<br>government<br>zzz_united_states<br>zzz_china<br>zzz_u_s<br>zzz_american<br>country<br>administration<br>zzz_clinton<br>million<br>nation<br>countries<br>president<br>economic<br>foreign<br>power<br>chinese<br>zzz_russia<br>political<br>plan<br>meeting<br>leader<br>trade<br>percent<br>right | companies<br>job<br>worker<br>company<br>business<br>firm<br>zzz_new_york<br>attack<br>president<br>employees<br>plan<br>need<br>law<br>percent<br>customer<br>industry<br>number<br>cost<br>terrorist<br>security<br>market<br>information<br>help<br>official<br>economy | president<br>program<br>zzz_bush<br>group<br>game<br>member<br>zzz_clinton<br>care<br>leader<br>health<br>zzz_white_house<br>vice<br>plan<br>job<br>children<br>patient<br>executive<br>worker<br>doctor<br>school<br>decision<br>director<br>zzz_congress<br>administration<br>chief |
|---------------------------------------------------------------------------------------------------------------------------------------------------------------------------------------------------------------------------------------------------------------|--------------------------------------------------------------------------------------------------------------------------------------------------------------------------------------------------------------------------------------------------------------------|---------------------------------------------------------------------------------------------------------------------------------------------------------------------------------------------------------------------------------------------------------------------------|------------------------------------------------------------------------------------------------------------------------------------------------------------------------------------------------------------------------------|------------------------------------------------------------------------------------------------------------------------------------------------------------------------------------------------------------------------------|-----------------------------------------------------------------------------------------------------------------------------------------------------------------------------------------------------------------------------------------------|----------------------------------------------------------------------------------------------------------------------------------------------------------------------------------------------------------------------------------------------------------------------------------------------------------------|----------------------------------------------------------------------------------------------------------------------------------------------------------------------------------------------------------------------------------------------------------------------------|---------------------------------------------------------------------------------------------------------------------------------------------------------------------------------------------------------------------------------------------------------------------------------------|

|                                                                                                                                                                                                                                                                            |                                                                                                                                                                                                                                                              |                                                                                                                                                                                                                                                         |                                                                                                                                                                                                                                                                                                                    |                                                                                                                                                                                                                                                                                                                                                                                                       |
|----------------------------------------------------------------------------------------------------------------------------------------------------------------------------------------------------------------------------------------------------------------------------|--------------------------------------------------------------------------------------------------------------------------------------------------------------------------------------------------------------------------------------------------------------|---------------------------------------------------------------------------------------------------------------------------------------------------------------------------------------------------------------------------------------------------------|--------------------------------------------------------------------------------------------------------------------------------------------------------------------------------------------------------------------------------------------------------------------------------------------------------------------|-------------------------------------------------------------------------------------------------------------------------------------------------------------------------------------------------------------------------------------------------------------------------------------------------------------------------------------------------------------------------------------------------------|
| government<br>companies<br>political<br>country<br>president<br>campaign<br>leader<br>business<br>election<br>zzz.bush<br>win<br>war<br>company<br>zzz.internet<br>billion<br>race<br>power<br>support<br>market<br>team<br>democratic<br>won<br>public<br>web<br>industry | season<br>team<br>won<br>race<br>win<br>attack<br>home<br>record<br>games<br>zzz.u.s<br>final<br>zzz.clinton<br>night<br>million<br>zzz.olympic<br>winning<br>coach<br>championship<br>patient<br>playoff<br>victory<br>american<br>trial<br>medal<br>series | right<br>zzz.united-states<br>american<br>war<br>student<br>look<br>need<br>show<br>home<br>question<br>black<br>military<br>left<br>country<br>com<br>women<br>word<br>put<br>zzz.american<br>help<br>room<br>zzz.u.s<br>zzz.america<br>percent<br>job | test<br>zzz.seattle_post_intelligencer<br>zzz.hearst_news_service<br>zzz.kansas.city<br>look<br>testing<br>houston<br>ellipses<br>anthrax<br>student<br>glories<br>mark<br>night<br>rare<br>zzz.texas<br>result<br>risk<br>exam<br>system<br>scores<br>missile<br>zzz.washington<br>body<br>according<br>scientist | file<br>onlytest<br>sport<br>notebook<br>zzz.los_angeles<br>onlyendpar<br>zzz.joe_haakenson_san_gabriel_valley_tribune<br>zzz.anaheim_angel<br>frontend<br>zzz.seattle_pi<br>zzz.seattle_post_intelligencer<br>zzz.chuck<br>zzz.abcdcfg_test<br>added<br>zzz.los_angeles_dodger<br>read<br>zzz.calif<br>output<br>email<br>internet<br>zzz.brian_dohn<br>files<br>zzz.scott_wolf<br>wrote<br>consumer |
|----------------------------------------------------------------------------------------------------------------------------------------------------------------------------------------------------------------------------------------------------------------------------|--------------------------------------------------------------------------------------------------------------------------------------------------------------------------------------------------------------------------------------------------------------|---------------------------------------------------------------------------------------------------------------------------------------------------------------------------------------------------------------------------------------------------------|--------------------------------------------------------------------------------------------------------------------------------------------------------------------------------------------------------------------------------------------------------------------------------------------------------------------|-------------------------------------------------------------------------------------------------------------------------------------------------------------------------------------------------------------------------------------------------------------------------------------------------------------------------------------------------------------------------------------------------------|
